# Supplementary material
Source: Springer Nature journal article supplement (https://www.springermedizin.de/resource/supplementary/12888_2013_1555_MOESM3_ESM.pdf/9481334)
Supplement: MOESM3 [file 9481334]

|                       | Random sequence generation (selection bias) | Allocation concealment (selection bias) | Blinding of outcome assessment (detection bias) | Incomplete outcome data (attrition bias) | Selective reporting (reporting bias) | Other bias |
|-----------------------|---------------------------------------------|-----------------------------------------|-------------------------------------------------|------------------------------------------|--------------------------------------|------------|
| BARBIC2009            | ?                                           | ?                                       | +                                               | ?                                        | ?                                    | +          |
| CHINMAN2013           | +                                           | -                                       | -                                               | -                                        | ?                                    | +          |
| CLARKE2000            | ?                                           | ?                                       | +                                               | ?                                        | ?                                    | +          |
| COOK2011              | +                                           | +                                       | +                                               | +                                        | +                                    | +          |
| COOK2012              | +                                           | +                                       | +                                               | +                                        | +                                    | +          |
| CRAIG2004             | +                                           | ?                                       | -                                               | +                                        | ?                                    | -          |
| DAVIDSON2004          | +                                           | +                                       | +                                               | ?                                        | ?                                    | +          |
| EDMUNDSON1982         | ?                                           | ?                                       | ?                                               | ?                                        | -                                    | +          |
| GESTEL-TIMMERMANS2012 | +                                           | +                                       | ?                                               | -                                        | +                                    | +          |
| KAPLAN2011            | +                                           | +                                       | +                                               | +                                        | -                                    | +          |
| PROUDFOOT2012         | +                                           | +                                       | +                                               | +                                        | -                                    | +          |
| RIVERA2007            | ?                                           | ?                                       | +                                               | +                                        | ?                                    | +          |
| ROGERS2007            | +                                           | +                                       | +                                               | ?                                        | ?                                    | +          |
| SEGAL2011             | +                                           | +                                       | -                                               | +                                        | -                                    | +          |
| SELLS2006             | ?                                           | ?                                       | +                                               | -                                        | -                                    | +          |
| SIMON2011             | +                                           | +                                       | +                                               | +                                        | ?                                    | +          |
| SLEDGE2011            | +                                           | ?                                       | +                                               | ?                                        | -                                    | +          |
| SOLOMON1995           | ?                                           | ?                                       | +                                               | +                                        | -                                    | +          |

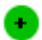

Low risk of bias;

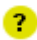

Unclear risk of bias;

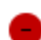

High risk of bias
